# Supplementary material for: Satellite-based near-real-time global daily terrestrial evapotranspiration estimates
Source: Copernicus journal article supplement (doi:10.5194/essd-16-3993-2024), 2024-09-12
Supplement: Supplementary file 1 [file essd-16-3993-2024-supplement.pdf]

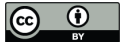

*Supplement of*

## **Satellite-based near-real-time global daily terrestrial evapotranspiration estimates**

**Lei Huang et al.**

*Correspondence to:* Lei Huang ([huangl@cma.gov.cn](mailto:huangl@cma.gov.cn)) and Yong Luo ([yongluo@mail.tsinghua.edu.cn](mailto:yongluo@mail.tsinghua.edu.cn))

The copyright of individual parts of the supplement might differ from the article licence.

**Table S1.** The 149 flux towers information

| <b>SITE_NAME</b>                                                             | <b>LOCATION_L<br/>AT</b> | <b>LOCATION_LO<br/>NG</b> | <b>LOCATIO<br/>N_ELEV</b> | <b>IGBP</b> | <b>MAT</b> | <b>MAP</b>  |
|------------------------------------------------------------------------------|--------------------------|---------------------------|---------------------------|-------------|------------|-------------|
| <b>San Luis</b>                                                              | -33.4648                 | -66.4598                  |                           | MF          |            | 400         |
| <b>Neustift</b>                                                              | 47.1167                  | 11.3175                   | 970                       | GRA         | 6.5        | 852         |
| <b>Alice Springs</b>                                                         | -22.283                  | 133.249                   |                           | SAV         |            |             |
| <b>Adelaide River</b>                                                        | -13.0769                 | 131.1178                  |                           | WSA         |            |             |
| <b>Calperum</b>                                                              | -34.0021                 | 140.5891                  |                           | SAV         |            |             |
| <b>Cumberland<br/>Plain</b>                                                  | -33.6152                 | 150.7236                  |                           | EBF         |            |             |
| <b>Daly River<br/>Savanna</b>                                                | -14.0633                 | 131.3181                  |                           | GRA         | 27.25      | 983.78      |
| <b>Daly River<br/>Cleared</b>                                                | -14.1593                 | 131.3881                  |                           | SAV         | 27.22      | 975.82      |
| <b>Dry River</b>                                                             | -15.2588                 | 132.3706                  |                           | SAV         |            |             |
| <b>Emerald</b>                                                               | -23.8587                 | 148.4746                  |                           | GRA         |            |             |
| <b>Fogg Dam</b>                                                              | -12.5452                 | 131.3072                  |                           | WET         | 27.02      | 1323.6<br>9 |
| <b>Great Western<br/>Woodlands,<br/>Western<br/>Australia,<br/>Australia</b> | -30.1913                 | 120.6541                  |                           | SAV         |            |             |
| <b>Gingin</b>                                                                | -31.3764                 | 115.7138                  |                           | WSA         |            |             |
| <b>Howard Springs</b>                                                        | -12.4943                 | 131.1523                  |                           | WSA         | 27.01      | 1449.3<br>5 |
| <b>Loxton</b>                                                                | -34.4704                 | 140.6551                  |                           | DBF         |            |             |
| <b>Red Dirt Melon<br/>Farm, Northern<br/>Territory</b>                       | -14.5636                 | 132.4776                  |                           | WSA         |            |             |
| <b>Riggs Creek</b>                                                           | -36.6499                 | 145.5759                  |                           | GRA         |            |             |
| <b>Robson Creek,<br/>Queensland,<br/>Australia</b>                           | -17.1175                 | 145.6301                  |                           | EBF         |            |             |
| <b>Sturt Plains</b>                                                          | -17.1507                 | 133.3502                  |                           | GRA         |            |             |
| <b>Ti Tree East</b>                                                          | -22.287                  | 133.64                    |                           | GRA         |            |             |

|                                                                           |          |          |        |     |       |             |
|---------------------------------------------------------------------------|----------|----------|--------|-----|-------|-------------|
| <b>Tumbarumba</b>                                                         | -35.6566 | 148.1517 | 1200   | EBF | 10.72 | 1159.0<br>1 |
| <b>Wallaby Creek</b>                                                      | -37.4259 | 145.1878 |        | EBF | 12.76 | 1105.5<br>9 |
| <b>Whroo</b>                                                              | -36.6732 | 145.0294 |        | EBF |       |             |
| <b>Wombat</b>                                                             | -37.4222 | 144.0944 | 705    | EBF |       |             |
| <b>Jaxa</b>                                                               | -34.9893 | 146.2907 |        | GRA |       |             |
| <b>Brasschaat</b>                                                         | 51.3076  | 4.5198   | 16     | MF  | 9.8   | 750         |
| <b>Lonzee</b>                                                             | 50.5516  | 4.7462   | 167    | CRO | 10    | 800         |
| <b>Vielsalm</b>                                                           | 50.3049  | 5.9981   | 493    | MF  | 7.8   | 1062        |
| <b>Santarem-Km83-<br/>Logged Forest</b>                                   | -3.018   | -54.9714 | 100    | EBF | 26.12 | 2043.7<br>7 |
| <b>Ontario -<br/>Groundhog<br/>River, Boreal<br/>Mixedwood<br/>Forest</b> | 48.2167  | -82.1556 | 340    | MF  | 1.3   | 831         |
| <b>Saskatchewan -<br/>Western Boreal,<br/>Mature Black<br/>Spruce</b>     | 53.9872  | -105.118 | 628.94 | ENF | 0.79  | 405.6       |
| <b>Quebec -<br/>Eastern Boreal,<br/>Mature Black<br/>Spruce</b>           | 49.6925  | -74.3421 | 382    | ENF | -0.36 | 962.32      |
| <b>Saskatchewan -<br/>Western Boreal,<br/>forest burned in<br/>1977</b>   | 54.485   | -105.818 | 536    | ENF | 0.4   | 470         |
| <b>Saskatchewan -<br/>Western Boreal,<br/>forest burned in<br/>1989</b>   | 54.2539  | -105.878 | 520    | ENF | 0.4   | 470         |
| <b>Saskatchewan -<br/>Western Boreal,<br/>forest burned in<br/>1998</b>   | 54.0916  | -106.005 | 540    | OSH | 0.4   | 470         |
| <b>Ontario - Turkey<br/>Point 2002<br/>Plantation White<br/>Pine</b>      | 42.6609  | -80.5595 | 265    | ENF | 8     | 1036        |

---

|                                                          |         |          |         |     |      |        |
|----------------------------------------------------------|---------|----------|---------|-----|------|--------|
| <b>Ontario - Turkey Point 1989 Plantation White Pine</b> | 42.7744 | -80.4588 | 212     | ENF | 8    | 1036   |
| <b>Ontario - Turkey Point 1974 Plantation White Pine</b> | 42.7068 | -80.3483 | 184     | ENF | 8    | 1036   |
| <b>Ontario - Turkey Point 1939 Plantation White Pine</b> | 42.7102 | -80.3574 | 184     | ENF | 8    | 1036   |
| <b>Ontario - Turkey Point Mature Deciduous</b>           | 42.6353 | -80.5577 | 260     | DBF | 8    | 1036   |
| <b>Chamau</b>                                            | 47.2102 | 8.4104   | 393     | GRA | 9.5  | 1136   |
| <b>Davos</b>                                             | 46.8153 | 9.8559   | 1639    | ENF | 2.8  | 1062   |
| <b>Früebüel</b>                                          | 47.1158 | 8.5378   | 982     | GRA | 7.2  | 1651   |
| <b>Changling</b>                                         | 44.5934 | 123.5092 |         | GRA |      |        |
| <b>Duolun_grassland (D01)</b>                            | 42.0467 | 116.2836 |         | GRA | 2.01 | 318.96 |
| <b>Duolun Degraded Meadow</b>                            | 42.0551 | 116.2809 |         | GRA |      |        |
| <b>Haibei Alpine Tibet site</b>                          | 37.37   | 101.18   |         | GRA |      |        |
| <b>Trebon (CZECHWET)</b>                                 | 49.0247 | 14.7704  | 426     | WET | 7.7  | 604    |
| <b>Gebesee</b>                                           | 51.0997 | 10.9146  | 161.5   | CRO | 8.5  | 470    |
| <b>Grillenburg</b>                                       | 50.95   | 13.5126  | 385     | GRA | 7.8  | 901    |
| <b>Hainich</b>                                           | 51.0792 | 10.4522  | 430     | DBF | 8.3  | 720    |
| <b>Klingenberg</b>                                       | 50.8931 | 13.5224  | 478     | CRO | 7.6  | 842    |
| <b>Lackenberg</b>                                        | 49.0996 | 13.3047  | 1308    | ENF | 4    | 1599   |
| <b>Leinefelde</b>                                        | 51.3282 | 10.3678  | 451     | DBF | 6.96 | 894.6  |
| <b>Oberbärenburg</b>                                     | 50.7867 | 13.7213  | 734     | ENF | 5.5  | 996    |
| <b>Rollesbroich</b>                                      | 50.6219 | 6.3041   | 514.7   | GRA | 7.7  | 1033   |
| <b>Selhausen Juelich</b>                                 | 50.8659 | 6.4471   | 102.755 | CRO | 10   | 700    |

---

|                            |         |          |      |     |      |       |
|----------------------------|---------|----------|------|-----|------|-------|
| <b>Selhausen</b>           | 50.8706 | 6.4497   | 103  | CRO | 9.9  | 693   |
| <b>Schechenfilz Nord</b>   | 47.8064 | 11.3275  | 590  | WET | 8.6  | 1127  |
| <b>Tharandt</b>            | 50.9626 | 13.5651  | 385  | ENF | 8.2  | 843   |
| <b>Zarnekow</b>            | 53.8759 | 12.889   | 0    | WET | 8.7  | 584   |
| <b>EngHAVE</b>             | 55.6905 | 12.1918  | 10   | GRA | 8    | 613   |
| <b>Foulum</b>              | 56.4842 | 9.5872   | 51   | CRO | 8    |       |
| <b>Soroe</b>               | 55.4859 | 11.6446  | 40   | DBF | 8.2  | 660   |
| <b>Amoladeras</b>          | 36.8336 | -2.2523  | 58   | OSH |      | 0     |
| <b>Llano de los Juanes</b> | 36.9266 | -2.7521  | 1600 | OSH | 16   | 400   |
| <b>Laguna Seca</b>         | 37.0979 | -2.9658  | 2267 | OSH |      |       |
| <b>Hyytiala</b>            | 61.8474 | 24.2948  | 181  | ENF | 3.8  | 709   |
| <b>Jokioinen</b>           | 60.8986 | 23.5134  | 109  | CRO | 4.6  | 627   |
| <b>Lettosuo</b>            | 60.6418 | 23.9595  | 111  | ENF | 4.6  | 627   |
| <b>Lompolojankka</b>       | 67.9972 | 24.2092  | 274  | WET | -1.4 | 484   |
| <b>Sodankyla</b>           | 67.3624 | 26.6386  | 180  | ENF | -1   | 500   |
| <b>Grignon</b>             | 48.8442 | 1.9519   | 125  | CRO | 12   | 650   |
| <b>Le Bray</b>             | 44.7171 | -0.7693  | 61   | ENF | 13.6 | 900   |
| <b>Puechabon</b>           | 43.7413 | 3.5957   | 270  | EBF | 13.5 | 883   |
| <b>Ankasa</b>              | 5.2685  | -2.6942  | 124  | EBF | 26   | 1900  |
| <b>ZackenberG Fen</b>      | 74.4814 | -20.5545 | 38   | WET | -9   | 211   |
| <b>Castel d'Asso1</b>      | 42.3804 | 12.0266  | 200  | DBF | 14   | 766   |
| <b>Castel d'Asso2</b>      | 42.3772 | 12.026   | 200  | CRO | 14   | 766   |
| <b>Castel d'Asso3</b>      | 42.38   | 12.0222  | 197  | DBF | 14   | 766   |
| <b>Collelongo</b>          | 41.8494 | 13.5881  | 1560 | DBF | 6.3  | 1180  |
| <b>Ispra ABC-IS</b>        | 45.8126 | 8.6336   | 210  | DBF | 12.2 | 1300  |
| <b>Lavarone</b>            | 45.9562 | 11.2813  | 1353 | ENF | 7.8  | 1291  |
| <b>Monte Bondone</b>       | 46.0147 | 11.0458  | 1550 | GRA | 5.1  | 1214  |
| <b>Parco Ticino forest</b> | 45.2009 | 9.061    | 60   | DBF | 12.7 | 984   |
| <b>Renon</b>               | 46.5869 | 11.4337  | 1730 | ENF | 4.7  | 809.3 |

|                                                       |         |          |      |     |       |        |
|-------------------------------------------------------|---------|----------|------|-----|-------|--------|
| <b>Roccarespampa ni 2</b>                             | 42.3903 | 11.9209  | 160  | DBF | 15.15 | 876.2  |
| <b>Torgnon</b>                                        | 45.8444 | 7.5781   | 2160 | GRA | 2.9   | 920    |
| <b>Pasoh Forest Reserve (PSO)</b>                     | 2.973   | 102.3062 |      | EBF |       |        |
| <b>Horstermeer</b>                                    | 52.2403 | 5.0713   | 2.2  | GRA | 10    | 800    |
| <b>Loobos</b>                                         | 52.1666 | 5.7436   | 25   | ENF | 9.8   | 786    |
| <b>Chokurdakh</b>                                     | 70.8291 | 147.4943 | 48   | OSH | -14.3 | 232    |
| <b>Fyodorovskoye</b>                                  | 56.4615 | 32.9221  | 265  | ENF | 3.9   | 711    |
| <b>Hakasia steppe</b>                                 | 54.7252 | 90.0022  | 446  | GRA | -0.07 | 591.87 |
| <b>Yakutsk Spasskaya Pad larch</b>                    | 62.255  | 129.168  | 246  | DNF |       |        |
| <b>Tiksi</b>                                          | 71.5943 | 128.8878 | 7    | GRA | -12.7 | 323    |
| <b>Seida/Vorkuta</b>                                  | 67.0547 | 62.9405  | 100  | CSH | -5.6  | 501    |
| <b>Demokeya</b>                                       | 13.2829 | 30.4783  | 500  | SAV | 26    | 320    |
| <b>Adventdalen</b>                                    | 78.186  | 15.923   | 17   | WET |       |        |
| <b>Dahra</b>                                          | 15.4028 | -15.4322 | 40   | SAV | 29    | 404    |
| <b>ARM USDA UNL OSU Woodward Switchgrass 1</b>        | 36.4267 | -99.42   | 611  | GRA |       |        |
| <b>ARM USDA UNL OSU Woodward Switchgrass 2</b>        | 36.6358 | -99.5975 | 646  | GRA |       |        |
| <b>ARM Southern Great Plains site- Lamont</b>         | 36.6058 | -97.4888 | 314  | CRO | 14.76 | 843    |
| <b>ARM Southern Great Plains burn site- Lamont</b>    | 35.5497 | -98.0402 | 424  | GRA |       |        |
| <b>ARM Southern Great Plains control site- Lamont</b> | 35.5465 | -98.04   | 424  | GRA |       |        |
| <b>Atqasuk</b>                                        | 70.4696 | -157.409 | 15   | WET | -9.7  | 93     |
| <b>Blodgett Forest</b>                                | 38.8953 | -120.633 | 1315 | ENF | 11.09 | 1226   |

---

|                                                                     |         |          |       |     |       |         |
|---------------------------------------------------------------------|---------|----------|-------|-----|-------|---------|
| <b>Curtice Walter-Berger cropland</b>                               | 41.6285 | -83.3471 | 180   | CRO | 10.1  | 849     |
| <b>Corral Pocket</b>                                                | 38.09   | -109.39  | 1520  | GRA |       |         |
| <b>GLEES Brooklyn Tower</b>                                         | 41.3658 | -106.24  | 3191  | ENF | 0.8   | 1200    |
| <b>GLEES</b>                                                        | 41.3665 | -106.24  | 3197  | ENF | 0.8   | 1200    |
| <b>Goodwin Creek</b>                                                | 34.2547 | -89.8735 | 87    | GRA | 15.89 | 1425.77 |
| <b>Fermi National Accelerator Laboratory-Batavia (Prairie site)</b> | 41.8406 | -88.241  | 226.5 | GRA | 9.04  | 930.25  |
| <b>Ivotuk</b>                                                       | 68.4865 | -155.75  | 568   | WET | -8.28 | 304     |
| <b>Kennedy Space Center (slash pine)</b>                            | 28.4583 | -80.6709 | 1     | ENF | 21.9  | 1266    |
| <b>Lindcove Orange Orchard</b>                                      | 36.3566 | -119.092 | 131   | CRO |       |         |
| <b>Lost Creek</b>                                                   | 46.0827 | -89.9792 | 480   | WET | 4.08  | 828     |
| <b>Morgan Monroe State Forest</b>                                   | 39.3232 | -86.4131 | 275   | DBF | 10.85 | 1032    |
| <b>Metolius - Eyerly burn</b>                                       | 44.5794 | -121.5   | 896   | ENF | 7.88  | 704.61  |
| <b>Metolius-second young aged pine</b>                              | 44.3154 | -121.608 | 1005  | ENF | 7.07  | 719     |
| <b>Metolius-first young aged pine</b>                               | 44.4372 | -121.567 | 1188  | ENF | 6.47  | 590.81  |
| <b>Metolius Young Pine Burn</b>                                     | 44.3233 | -121.608 | 998   | ENF | 7.59  | 494     |
| <b>Niwot Ridge Forest (LTER NWT1)</b>                               | 40.0329 | -105.546 | 3050  | ENF | 1.5   | 800     |
| <b>Mead - irrigated continuous maize site</b>                       | 41.1651 | -96.4766 | 361   | CRO | 10.07 | 790.37  |
| <b>Mead - irrigated maize-soybean rotation site</b>                 | 41.1649 | -96.4701 | 362   | CRO | 10.08 | 788.89  |

---

---

|                                                                  |         |          |     |     |       |        |
|------------------------------------------------------------------|---------|----------|-----|-----|-------|--------|
| <b>Mead - rainfed<br/>maize-soybean<br/>rotation site</b>        | 41.1797 | -96.4397 | 363 | CRO | 10.11 | 783.68 |
| <b>Olentangy River<br/>Wetland<br/>Research Park</b>             | 40.0201 | -83.0183 | 221 | WET | 11.63 | 1499.1 |
| <b>Poker Flat<br/>Research Range<br/>Black Spruce<br/>Forest</b> | 65.1237 | -147.488 | 210 | ENF | -2    | 275    |
| <b>Santa Rita<br/>Creosote</b>                                   | 31.9083 | -110.84  | 950 | OSH | 22    | 330    |

---



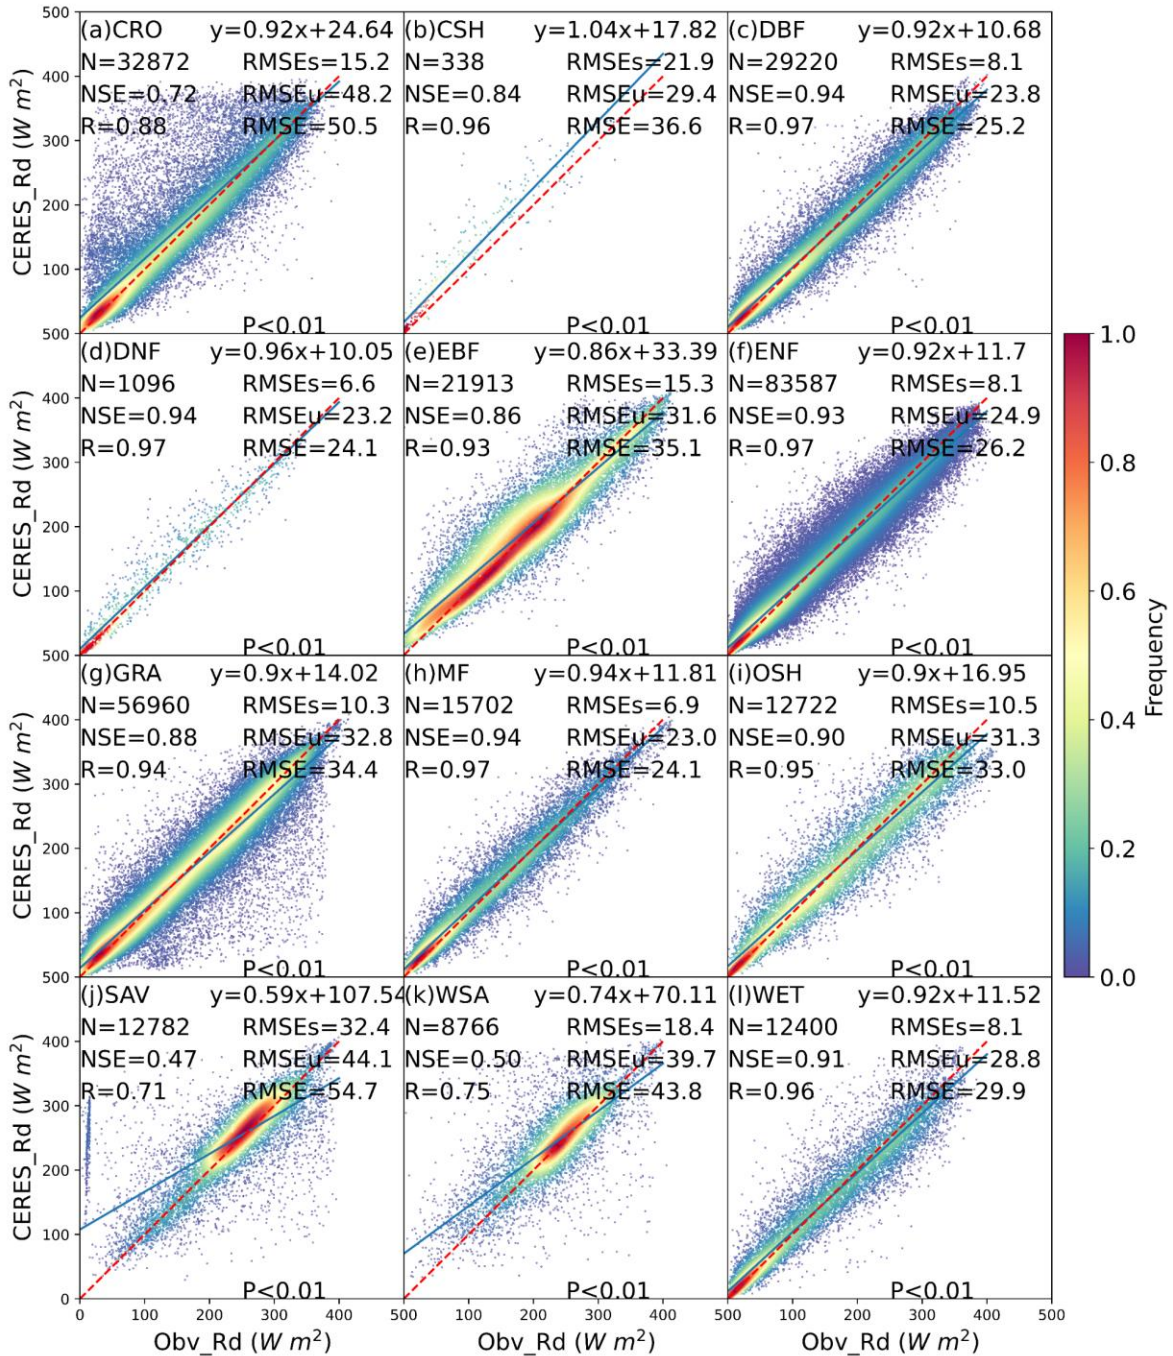

**Figure S1.** The scatter plot of daily downwards shortwave from Clouds and the Earth's Radiant Energy System (CERES) compared with local instruments measurements (Obv\_Rd) under 12 IGBP land cover types: CRO (Croplands), CSH (Closed shrublands), DBF (Deciduous broadleaf forests), DNF (Deciduous needle leaf forests), EBF (Evergreen broadleaf forests), ENF (Evergreen needle leaf forests), GRA (Grasslands), MF (Mixed forests), OSH (Open shrublands), SAV (Savannas), WSA (Woody savannas), WET (Permanent wetlands). The red dotted line is the 1:1 line. N is the number of data points, NSE is Nash-Sutcliffe Efficiency, R is correlation coefficients, RMSE is Root Mean Square Error. The frequency denotes the probability density estimated through the Kernel Density Estimation, KDE method with a Gaussian kernel, and it is then scaled to ensure that the maximum value of the probability density function equals 1.

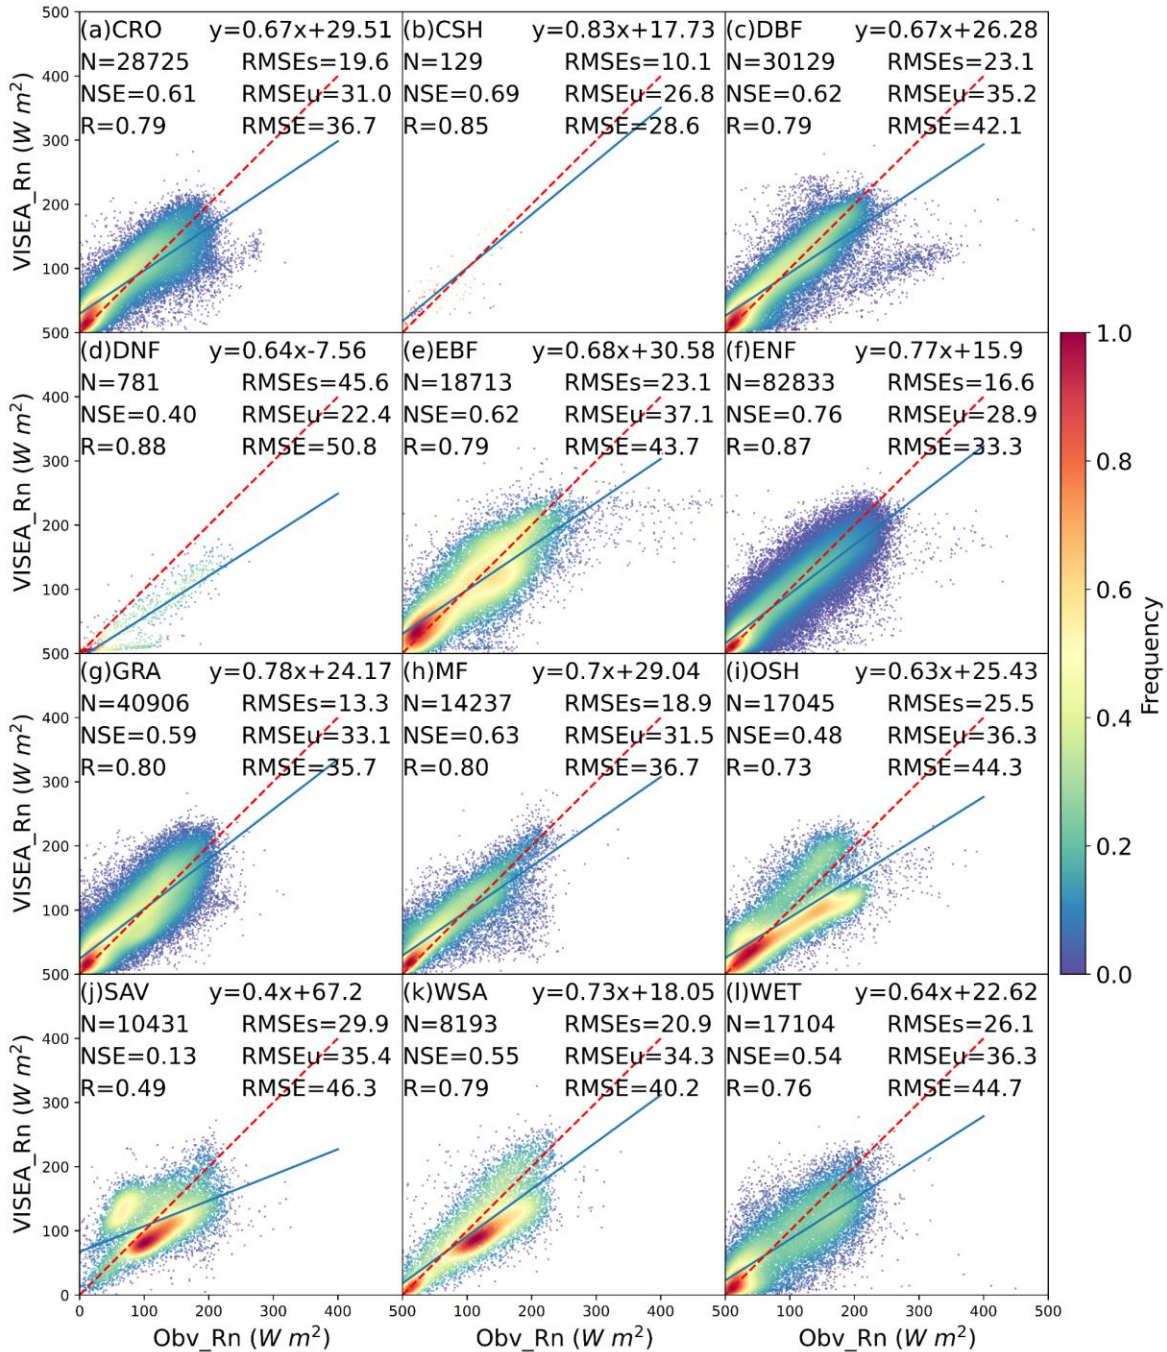

**Figure S2.** The scatter plot of daily net radiation with the Rd from CERES as inputs (CERES\_Rn) compared with local instruments measurements (Obv\_Rn) under 12 IGBP land cover types: CRO (Croplands), CSH (Closed shrublands), DBF (Deciduous broadleaf forests), DNF (Deciduous needle leaf forests), EBF (Evergreen broadleaf forests), ENF (Evergreen needle leaf forests), GRA (Grasslands), MF (Mixed forests), OSH (Open shrublands), SAV (Savannas), WSA (Woody savannas), WET (Permanent wetlands). The red dotted line is the 1:1 line. R is correlation coefficients, RMSE is Root Mean Square Error. The frequency denotes the probability density estimated through the Kernel Density Estimation, KDE method with a Gaussian kernel, and it is then scaled to ensure that the maximum value of the probability density function equals 1.

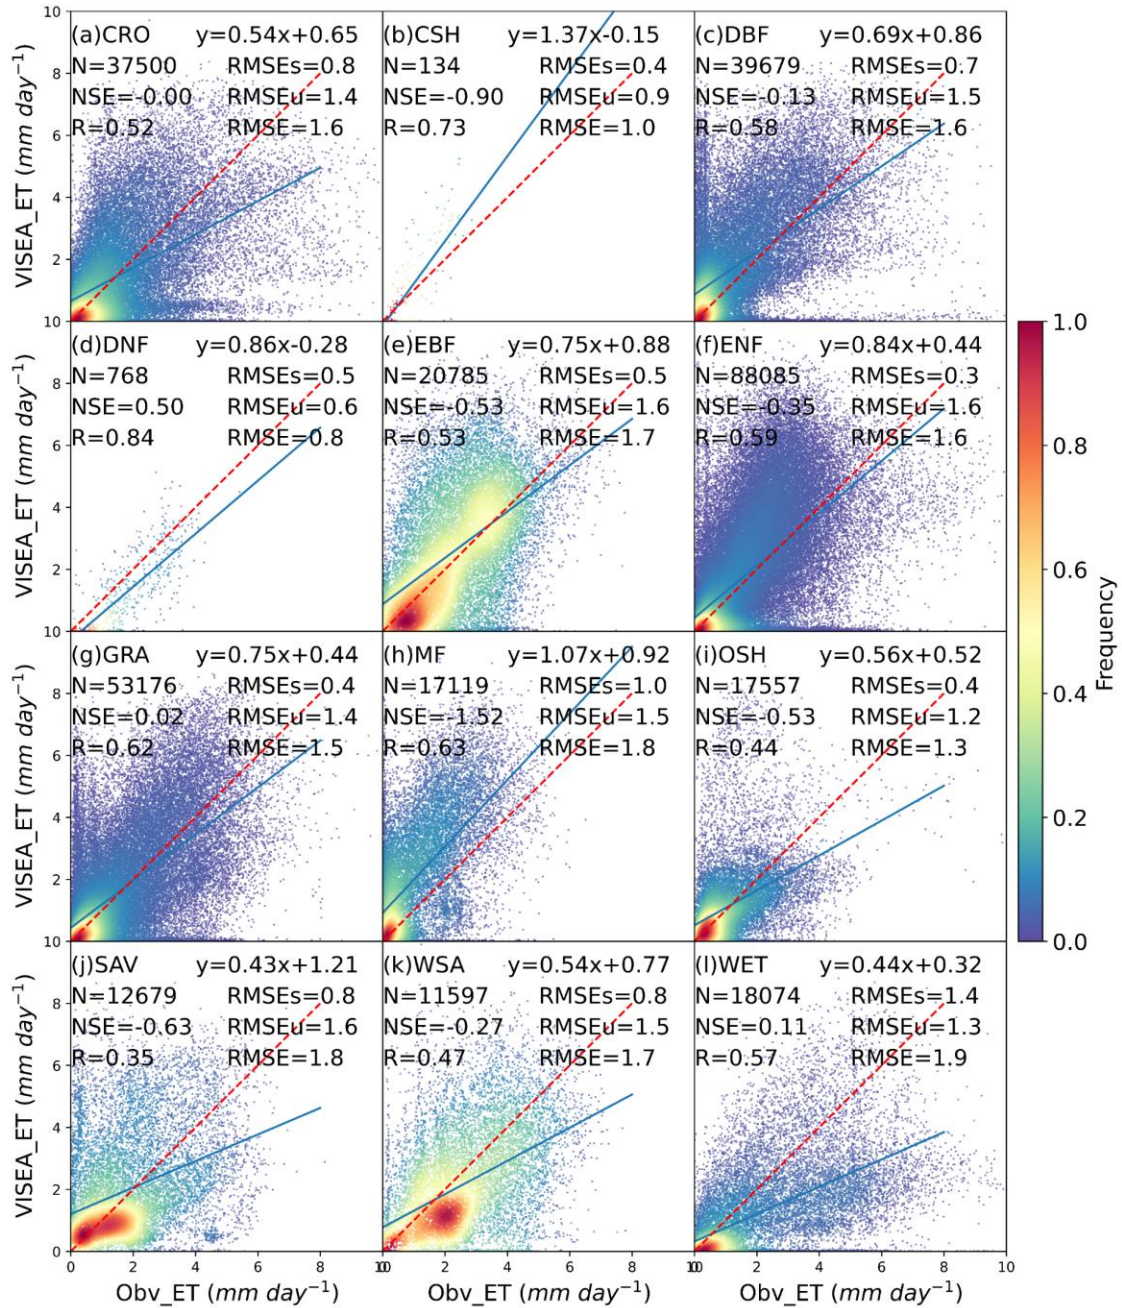

**Figure S3.** The scatter plot of daily ET simulated by VISEA with Rd from CERES as inputs compared with local instruments measurements (Obsv\_Rn) under 12 IGBP land cover types: CRO (Croplands), CSH (Closed shrublands), DBF (Deciduous broadleaf forests), DNF (Deciduous needle leaf forests), EBF (Evergreen broadleaf forests), ENF (Evergreen needle leaf forests), GRA (Grasslands), MF (Mixed forests), OSH (Open shrublands), SAV (Savannas), WSA (Woody savannas), WET (Permanent wetlands). The red dotted line is the 1:1 line. N is the number of data points, NSE is Nash-Sutcliffe Efficiency, R is correlation coefficients, RMSE is Root Mean Square Error. The frequency denotes the probability density estimated through the Kernel Density Estimation, KDE method with a Gaussian kernel, and it is then scaled to ensure that the maximum value of the probability density function equals 1.

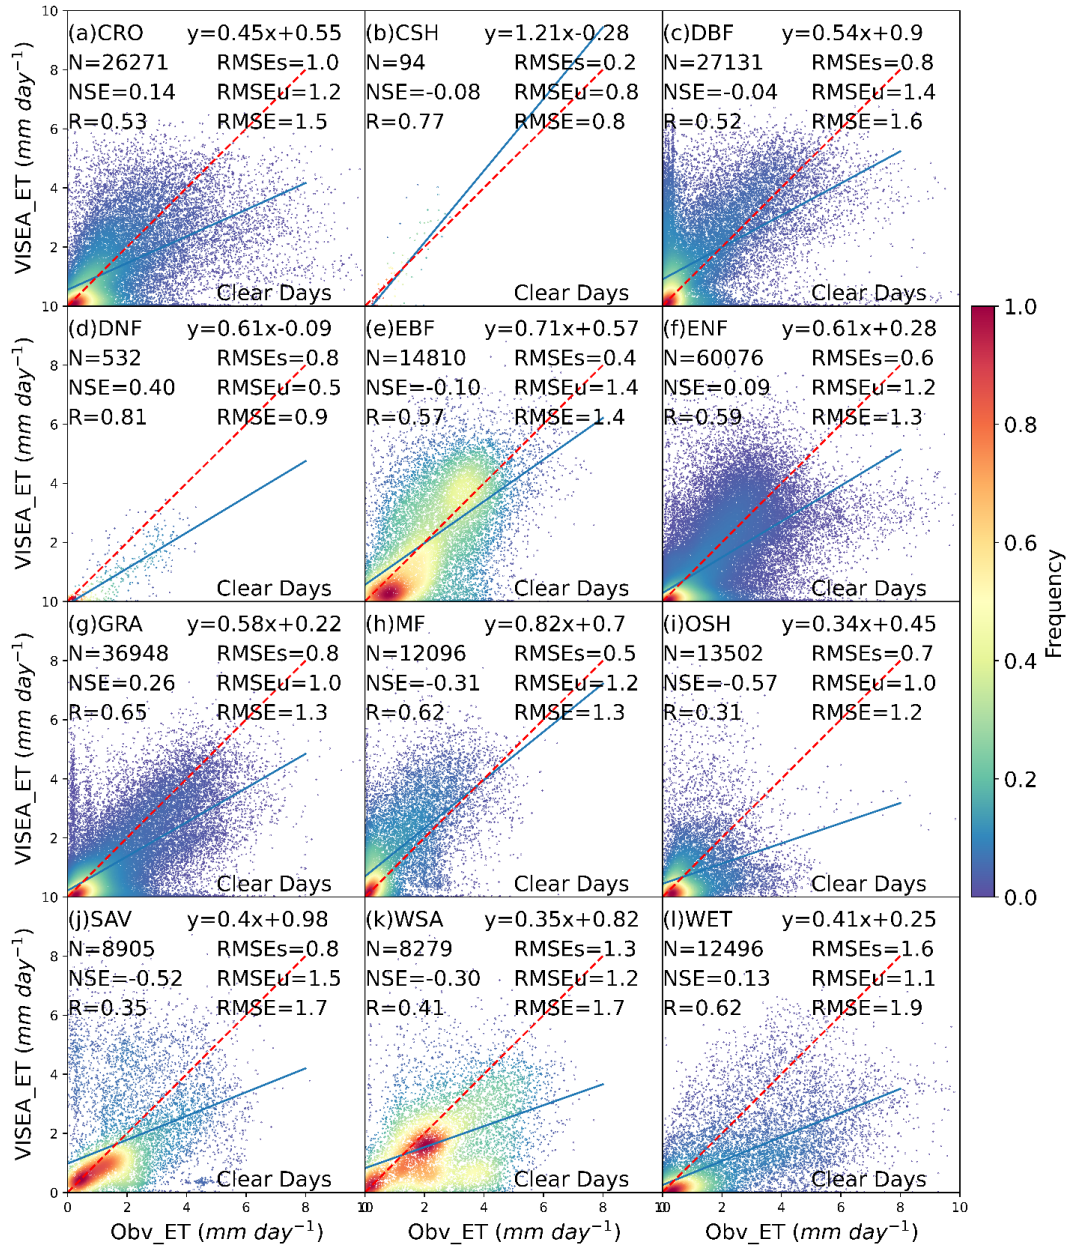

**Figure S4.** The scatter plot of daily simulated ET by VISEA (VISEA\_ET) compared with local instruments measurements (Obv\_ET) when MODIS land surface temperature is available (defined as clear days) under 12 IGBP land cover types: CRO (Croplands), CSH (Closed shrublands), DBF (Deciduous broadleaf forests), DNF (Deciduous needle leaf forests), EBF (Evergreen broadleaf forests), ENF (Evergreen needle leaf forests), GRA (Grasslands), MF (Mixed forests), OSH (Open shrublands), SAV (Savannas), WSA (Woody savannas), WET (Permanent wetlands). The red dotted line is the 1:1 line. N is the number of data points, NSE is Nash-Sutcliffe Efficiency, R is correlation coefficients, RMSE is Root Mean Square Error, RMSEs is systematic RMSE, and RMSEu is unsystematic RMSE. The frequency denotes the probability density estimated through the Kernel Density Estimation, KDE method with a Gaussian kernel, and it is then scaled to ensure that the maximum value of the probability density function equals 1.

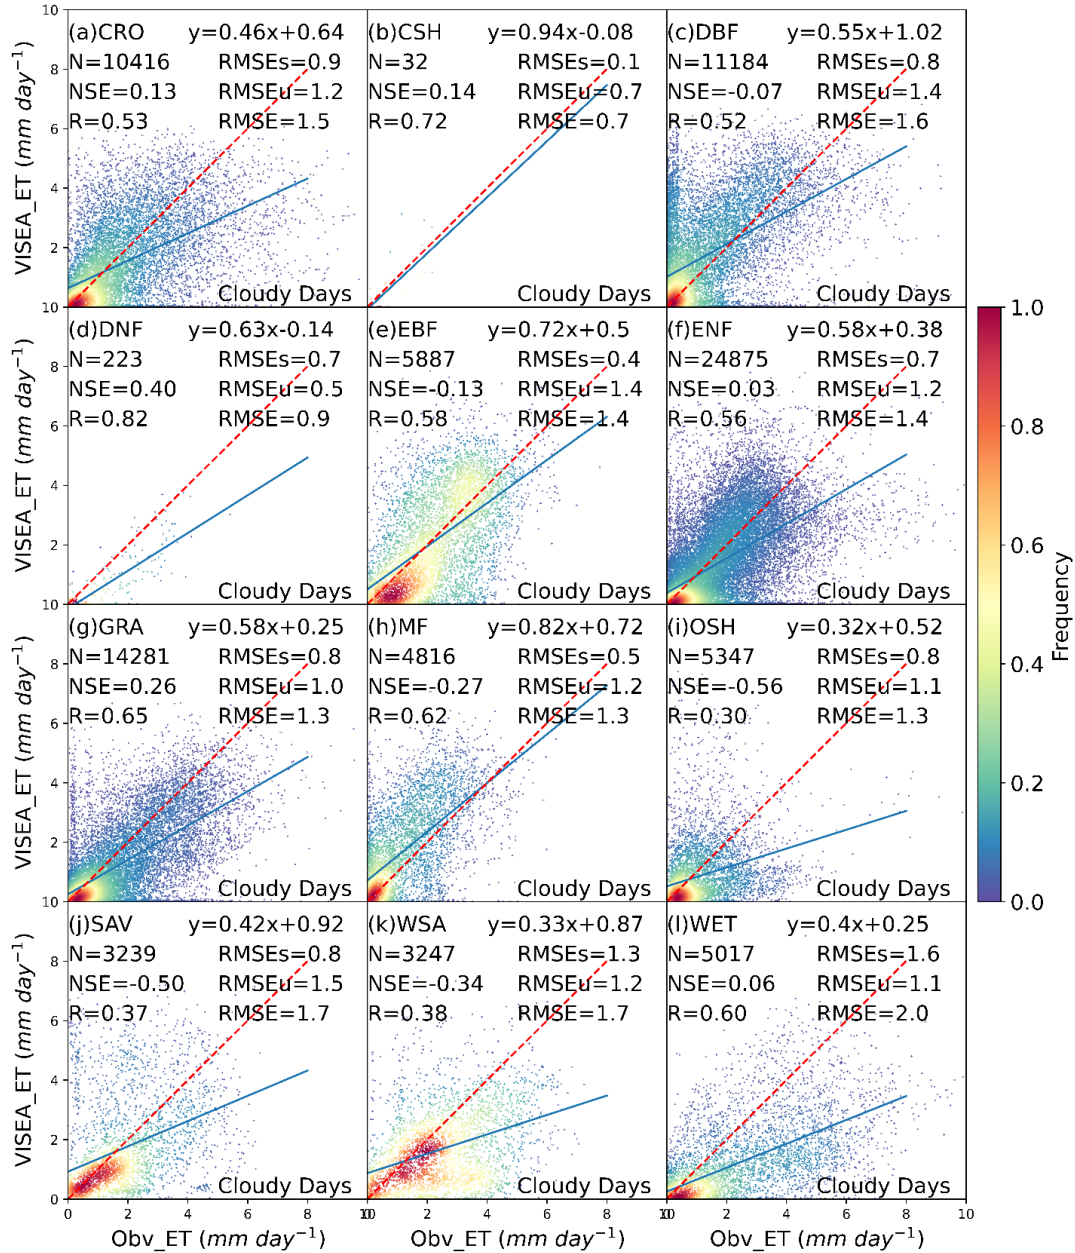

**Figure S5.** The scatter plot of daily ET simulated by VISEA (VISEA\_ET) compared with local instruments measurements (Obsv\_ET) when the MODIS land surface temperature is not available (we define as cloudy days) under 12 IGBP land cover types: CRO (Croplands), CSH (Closed shrublands), DBF (Deciduous broadleaf forests), DNF (Deciduous needle leaf forests), EBF (Evergreen broadleaf forests), ENF (Evergreen needle leaf forests), GRA (Grasslands), MF (Mixed forests), OSH (Open shrublands), SAV (Savannas), WSA (Woody savannas), WET (Permanent wetlands). The red dotted line is the 1:1 line. N is the number of data points, NSE is Nash-Sutcliffe Efficiency, R is correlation coefficients, RMSE is Root Mean Square Error, RMSEs is systematic RMSE, and RMSEu is unsystematic RMSE. The frequency denotes the probability density estimated through the Kernel Density Estimation, KDE method with a Gaussian kernel, and it is then scaled to ensure that the maximum value of the probability density function equals 1.

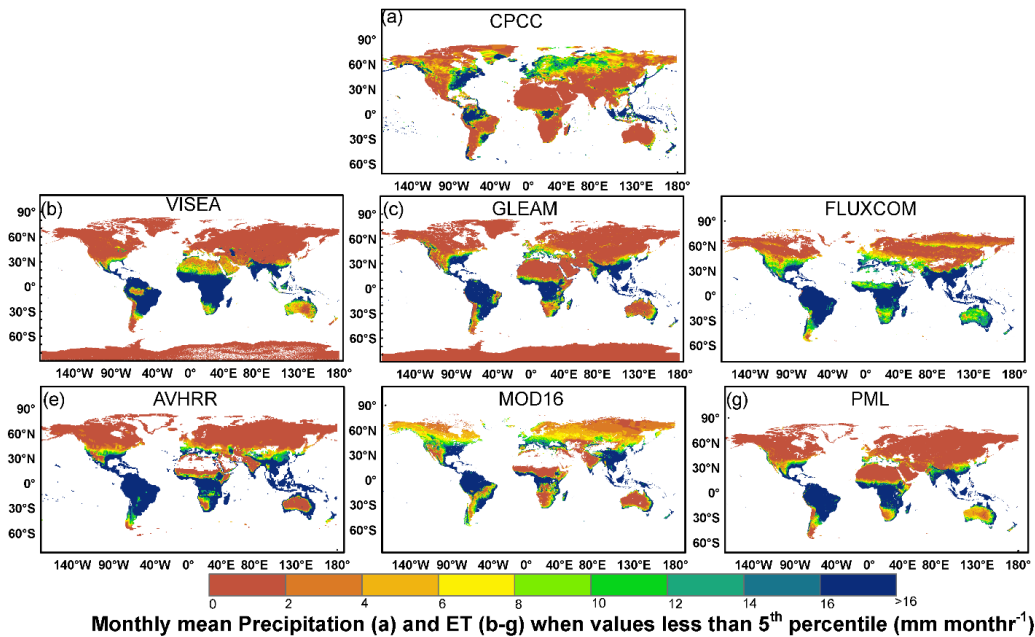

**Figure S6.** Monthly mean precipitation (a) and ET (b-g) when values less than 5<sup>th</sup> percentile ( $\text{mm month}^{-1}$ ) (a) GPCC (2001-2019), (b) VISEA (2001-2020), (c) GLEAM (2001-2020), (d) FLUXCOM (2001-2016), (e) AVHRR (2001-2006), (f) MOD16 (2001-2014) and (g) PML (2003-2018).

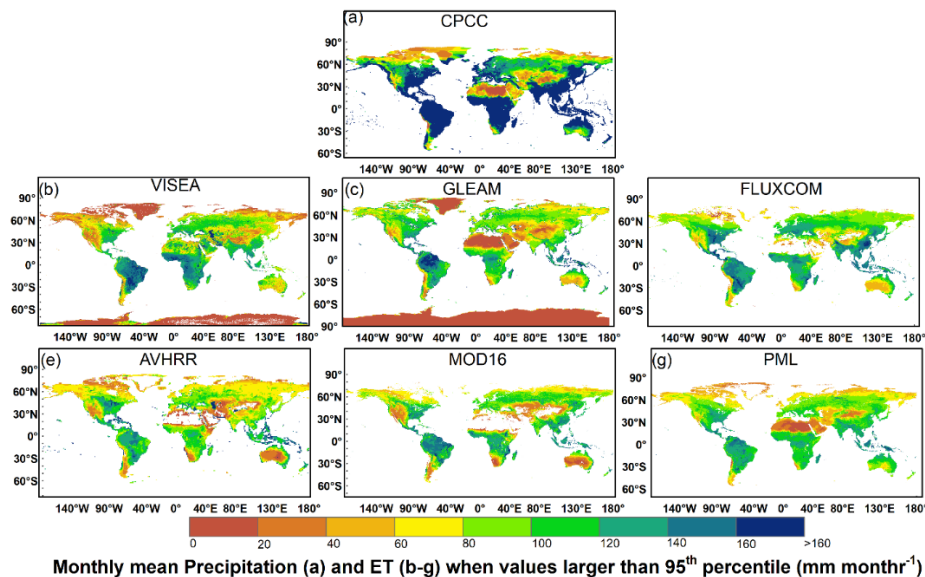

**Figure S7.** Monthly mean precipitation (a) and ET (b-g) when values large than 95<sup>th</sup> percentile ( $\text{mm month}^{-1}$ ) (a) GPCC (2001-2019), (b) VISEA (2001-2020), (c) GLEAM (2001-2020), (d) FLUXCOM (2001-2016), (e) AVHRR (2001-2006), (f) MOD16 (2001-2014) and (g) PML (2003-2018).
